# Supplementary material for: Soybean (Glycine max) Cropland Suitability Analysis in Subtropical Desert Climate through GIS-Based Multicriteria Analysis and Sentinel-2 Multispectral Imaging
Source: MDPI journal article supplement (doi:10.3390/land12112034), 2023-11-08
Supplement: s1 [file s1]

# Soybean (*Glycine max*) Cropland Suitability Analysis in Subtropical Desert Climate through GIS-Based Multicriteria Analysis and Sentinel-2 Multispectral Imaging

Noman Ahmad <sup>1,†</sup>, Fazila Younas <sup>2,†</sup>, Hamaad Raza Ahmad <sup>1,†</sup>, Muhammad Sarfraz <sup>3</sup>, Muhammad Ashar Ayub <sup>4</sup>, Muhammad Aamer Maqsood <sup>1</sup>, Fahd Rasul <sup>5</sup>, Muhammad Fahad Sardar <sup>6,\*</sup>, Tariq Mehmood <sup>7</sup>, Jamaan S. Ajarem <sup>8</sup>, Saleh n. Maoda <sup>8</sup>, Xiang Li <sup>9</sup> and Zhaojie Cui <sup>2,\*</sup>

<sup>1</sup> Institute of Soil and Environmental Sciences, University of Agriculture Faisalabad, Faisalabad 38040, Pakistan; 2017ag9824@uaf.edu.pk (N.A.); hamaadkhan@uaf.edu.pk (H.R.A.); mohamgill@uaf.edu.pk (M.A.M.)

<sup>2</sup> School of Environmental Science and Engineering, Shandong University, Qingdao 266237, China; 2015ag441@uaf.edu.pk or fazila.younas@gmail.com

<sup>3</sup> Soil Salinity Research Institute, Pindi Bhattian, Hafizabad 52180, Pakistan; sarfrazpnd@gmail.com

<sup>4</sup> Institute of Agro-Industry and Environment, The Islamia University of Bahawalpur, 63100 Bahawalpur, Pakistan; ashar.ayub@iub.edu.pk

<sup>5</sup> Department of Agronomy, University of Agriculture Faisalabad, 38040 Faisalabad, Pakistan; drfahdrasul@gmail.com

<sup>6</sup> Key Laboratory of Ecological Prewarning, Protection and Restoration of Bohai Sea, Ministry of Natural Resources, School of Life Sciences, Shandong University, Qingdao 266237, China

<sup>7</sup> Helmholtz Centre for Environmental Research—UFZ, Department of Environmental Engineering, Permoserstr 15, D-04318 Leipzig, Germany; tariq.mehmood@ufz.de

<sup>8</sup> Zoology Department, College of Science, King Saud University, Riyadh 11451, Saudi Arabia; jajarem@ksu.edu.sa (J.S.A.); smaadhah@ksu.edu.sa (S.n.M.)

<sup>9</sup> College of Landscape Architecture and Art, Northwest A&F University, Yangling 712100, China; lx@nwafu.edu.cn

\* Correspondence: fahadsardar16@yahoo.com or fahadsardar@sdu.edu.cn (M.F.S.); cuizj@sdu.edu.cn (Z.C.)

† These authors contributed equally to this work.

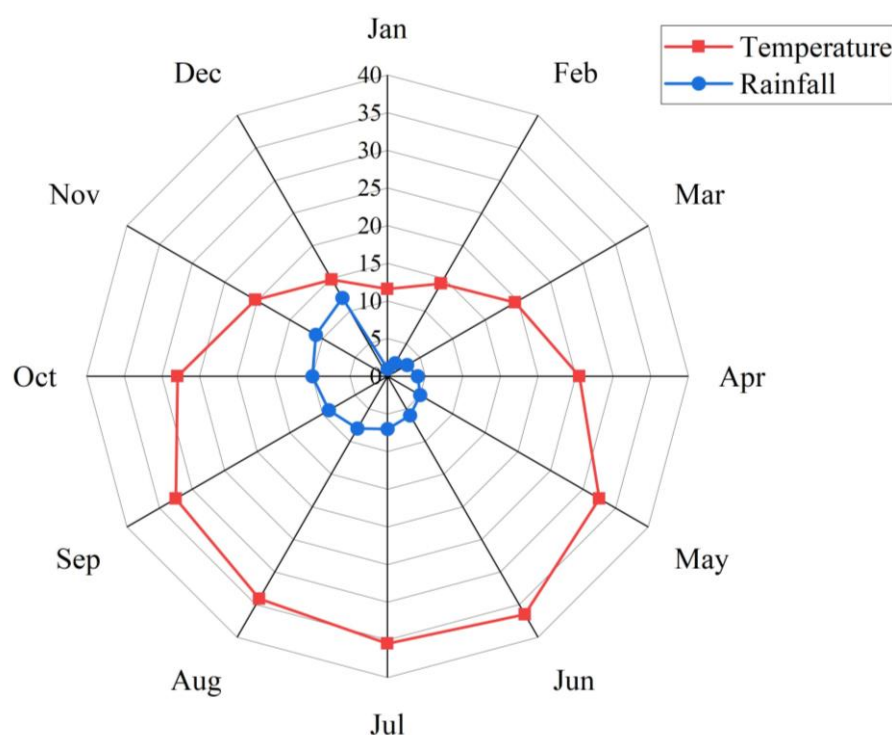

Figure S1. Monthly average met data for the study area, year 2022.

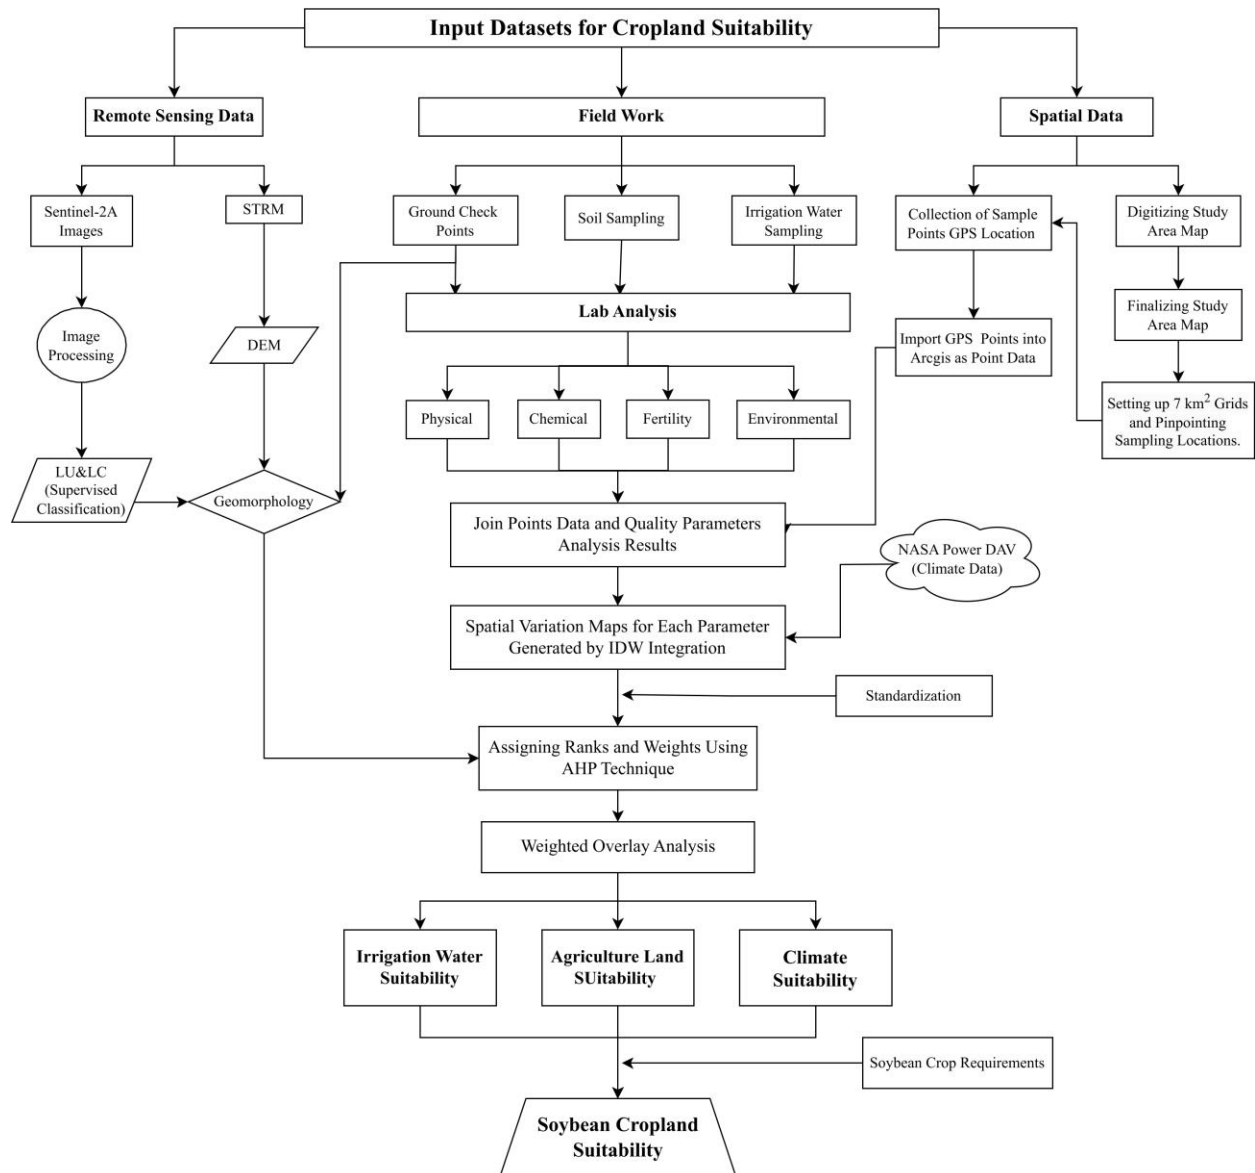

**Figure S2.** A Visual Overview of the Cropland Suitability Assessment Process.

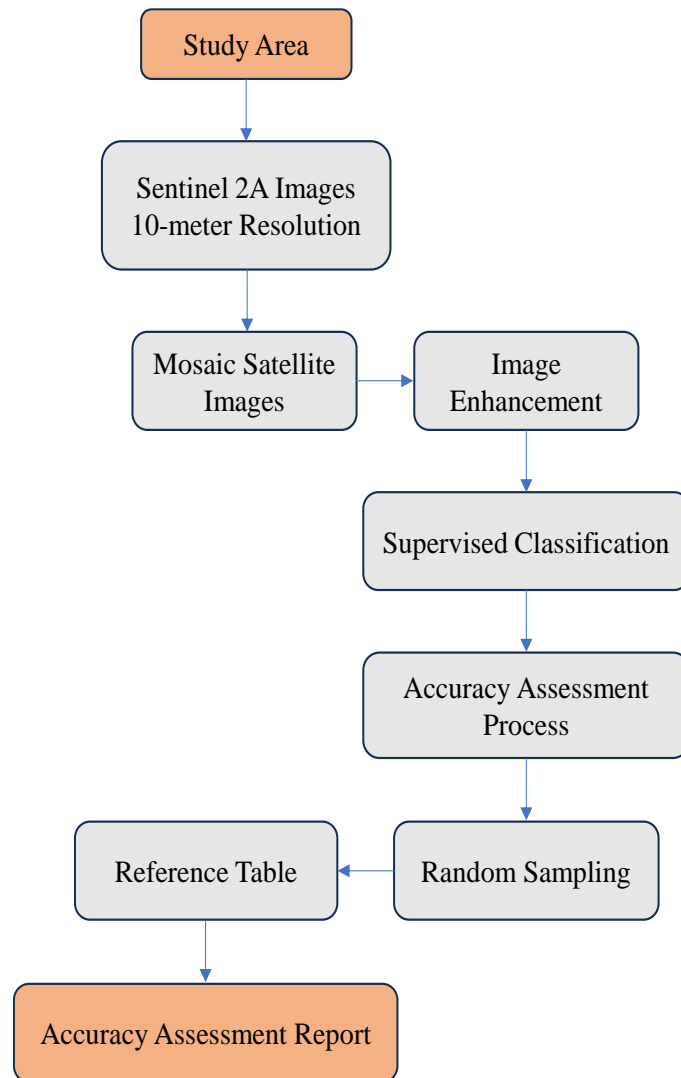

**Figure S3.** Schematic of workflow for LU&LC *classification* and accuracy assessment.

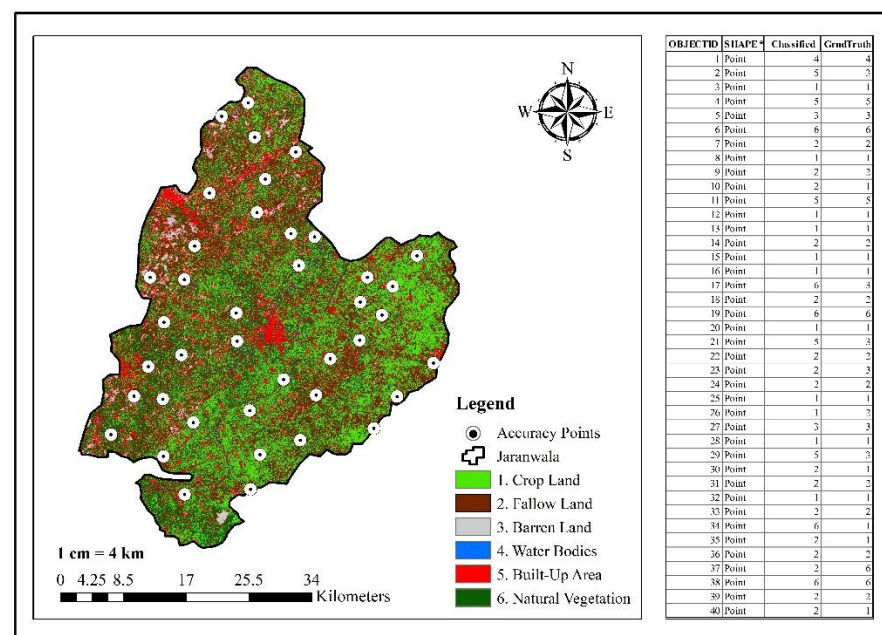

**Figure S4.** Sentinel 2A (classified) image of the study area, adorned with 40 randomly sampled points.

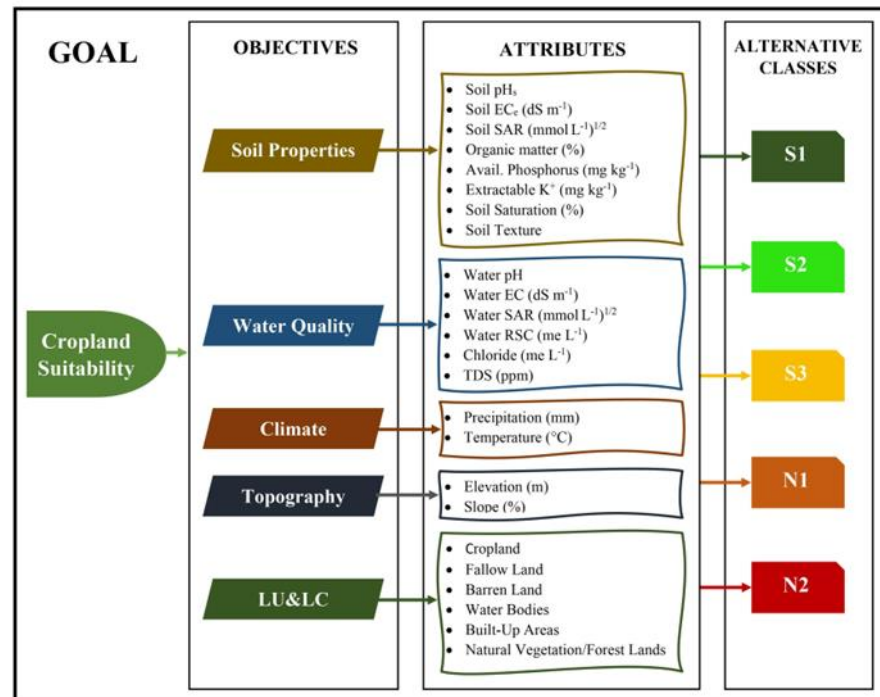

Figure S5. Hierarchical arrangement of assessment standards used in the study.

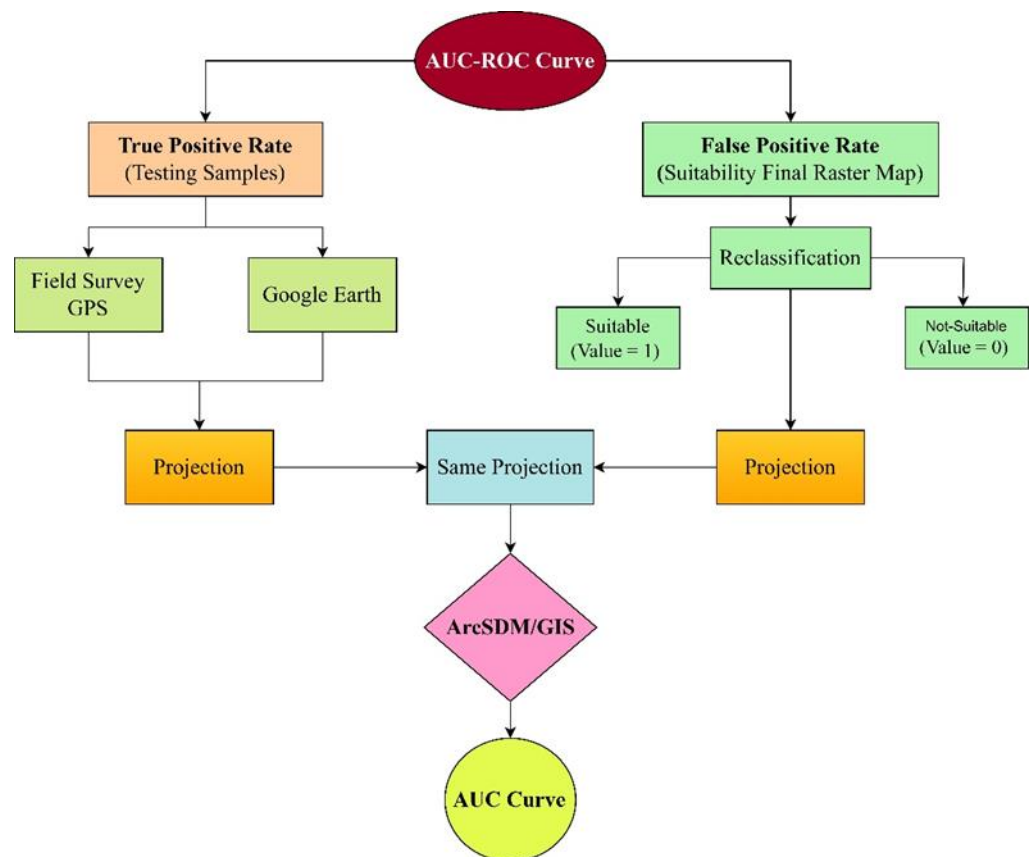

Figure S6. Schematic diagram depicting the receiver operating characteristic (ROC) analysis methodology.

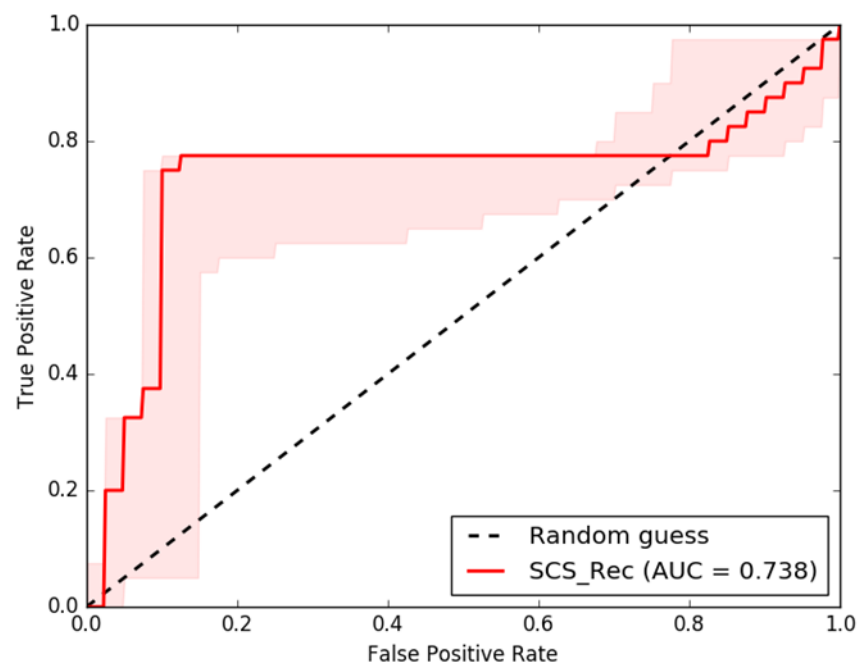

**Figure S7.** ROC-AUC validation results for Soybean Cropland Suitability (SCS).

**Table S1.** Spatial location of soil and irrigation water sampling sites.

| Sample# | Address Code | X-Coordinates | Y-Coordinates | Water Source | Address                                                                                                                                             |
|---------|--------------|---------------|---------------|--------------|-----------------------------------------------------------------------------------------------------------------------------------------------------|
| 01      | 648 GB.T     | 73.48609924   | 31.33919907   | Tube Well    | Acre No. 25, Square No. 56, Chak No. 648 G.B, Lahore Road, Tehsil Jaranwala, District Faisalabad, Province Punjab, Pakistan                         |
| 02      | 647 GB.T     | 73.56790161   | 31.29369926   | Tube Well    | Acre No. 19, Square No. 15, Chak No. 647 G.B (Kot Bala karam), Lahore Road, Tehsil Jaranwala, District Faisalabad, Province Punjab, Pakistan        |
| 03      | 569 GB.T     | 73.56590271   | 31.33359909   | Tube Well    | Acre No. 7, Square No.7, Chak No. 569 G.B (Abdullah Khan), Tehsil Jaranwala, District Faisalabad, Province Punjab, Pakistan                         |
| 04      | 643 GB.T     | 73.62229919   | 31.35050011   | Tube Well    | Acre No. 1, Square No. 5, Chak No. 643 G.B (Sattarnagar), Tehsil Jaranwala, District Faisalabad, Province Punjab, Pakistan                          |
| 05      | 235 GB.C     | 73.48809814   | 31.39920044   | Canal Water  | Acre No. 18, Square No. 15, Chak No. 235 G.B, Tehsil Jaranwala, District Faisalabad, Province Punjab, Pakistan                                      |
| 06      | 563 GB.T     | 73.6207962    | 31.41130066   | Tube Well    | Acre No. 15, Square No. 57, Chak No. 563 G.B (Baggi Mahal), Tehsil Jaranwala, District Faisalabad, Province Punjab, Pakistan                        |
| 07      | 59 GB.T      | 73.43190002   | 31.41600037   | Tube Well    | Acre No. 15, Square No. 41, Chak No. 59 GB (Atalgarh), Shah Kot Road, Tehsil Jaranwala, District Faisalabad, Province Punjab, Pakistan              |
| 08      | 635 GB.C     | 73.54799652   | 31.40979958   | Canal Water  | Acre No. 03, Square No. 50, Chak No. 635 GB (Kot Sardaran), Nankana Sahib Road, Tehsil Jaranwala, District Faisalabad, Province Punjab, Pakistan    |
| 09      | 99 RB.C      | 73.36779785   | 31.47480011   | Canal Water  | Acre No. 09, Square No. 17, Chak No. 99 RB (Jandiala Kalan), Tehsil Jaranwala, District Faisalabad, Province Punjab, Pakistan                       |
| 10      | 95 RB.C      | 73.43599701   | 31.47459984   | Canal Water  | Acre No. 18, Square No. 23, Chak No. 95 (New Jamsher), Dosanj to New Jamsher Road, Tehsil Jaranwala, District Faisalabad, Province Punjab, Pakistan |
| 11      | 90 RB.T      | 73.43039703   | 31.54850006   | Tube Well    | Acre No. 23, Square No. 31, Chak No. 90 RB (Chitti Khurd), Tehsil Jaranwala, District Faisalabad, Province Punjab, Pakistan                         |
| 12      | 52 RB.T      | 73.42359924   | 31.61070061   | Tube Well    | Acre No. 06, Square No. 72, Chak No. 52 RB (Bawa Chak), Tehsil Jaranwala, District Faisalabad, Province Punjab, Pakistan                            |
| 13      | 68 RB.C      | 73.36699677   | 31.54089928   | Canal Water  | Acre No. 21, Square No. 16, Chak No. 68 RB (Kallah), Tehsil Jaranwala, District Faisalabad, Province Punjab, Pakistan                               |
| 14      | 77 RB.C      | 73.30280304   | 31.48380089   | Canal Water  | Acre No. 19, Square No. 38, Chak No. 77 RB (Lohka Kalaan), Tehsil Jaranwala, District Faisalabad, Province Punjab, Pakistan                         |
| 15      | 103 GB.T     | 73.36640167   | 31.41049957   | Tube Well    | Acre No. 05, Square No. 16, Chak No. 103 GB (Pathanwala), Khurianwala Road, Tehsil Jaranwala, District Faisalabad, Province Punjab, Pakistan        |
| 16      | 61 GB.T      | 73.4334238    | 31.3723466    | Tube Well    | Acre No. 02, Square No. 03, Chak No. 61 GB (Nai Abadi), Khurianwala Road, Tehsil Jaranwala, District Faisalabad, Province Punjab, Pakistan          |

|    |          |             |             |             |                                                                                                                                                                            |
|----|----------|-------------|-------------|-------------|----------------------------------------------------------------------------------------------------------------------------------------------------------------------------|
|    |          |             |             |             | Punjab, Pakistan                                                                                                                                                           |
| 17 | 2 GB.T   | 73.50039673 | 31.29170036 | Tube Well   | Acre No. 16, Square No. 12, Chak No. 651/2 GB (Ghos Nagar), Tehsil Jaranwala, District Faisalabad, Province Punjab, Pakistan                                               |
| 18 | 274 GB.T | 73.36720276 | 31.16539955 | Tube Well   | Acre No. 04, Square No. 19, Chak No. 274 GB (Bacheana), Tehsil Jaranwala, District Faisalabad, Province Punjab, Pakistan                                                   |
| 19 | 633 GB.T | 73.49539948 | 31.22570038 | Tube Well   | Acre No. 20, Square No. 36, Chak No. 633 GB (Jhok Bhukari), Tehsil Jaranwala, District Faisalabad, Province Punjab, Pakistan                                               |
| 20 | 89 GB.C  | 73.17960358 | 31.22060013 | Canal Water | Acre No. 08, Square No. 35, Chak No. 89 GB, Tehsil Jaranwala, District Faisalabad, Province Punjab, Pakistan                                                               |
| 21 | 229 GB.C | 73.24569702 | 31.14850044 | Canal Water | Acre No. 17, Square No. 08, Chak No. 229 GB (Fazalpur), Tehsil Jaranwala, District Faisalabad, Province Punjab, Pakistan                                                   |
| 22 | 34 GB.C  | 73.24130249 | 31.28389931 | Canal Water | Acre No. 06, Square No. 10, Chak No. 34 GB (Boote di chal), Satiana Road, Tehsil Jaranwala, District Faisalabad, Province Punjab, Pakistan                                 |
| 23 | 116 GB.T | 73.23439789 | 31.22170067 | Tube Well   | Acre No. 07, Square No. 12, Chak No. 116 GB, Satiana Road, Tehsil Jaranwala, District Faisalabad, Province Punjab, Pakistan                                                |
| 24 | 24 GB.C  | 73.31369781 | 31.27499962 | Canal Water | Acre No. 18, Square No. 11, Chak No. 24 GB (Gangapur), Satiana Road, Tehsil Jaranwala, District Faisalabad, Province Punjab, Pakistan                                      |
| 25 | 353 GB.C | 73.43890381 | 31.28540039 | Canal Water | Acre No. 13, Square No. 21, Chak No. 353 GB (Kot Baqar), Sayedwala Road, Tehsil Jaranwala, District Faisalabad, Province Punjab, Pakistan                                  |
| 26 | 384 GB.T | 73.36640167 | 31.2227993  | Tube Well   | Acre No. 09, Square No. 02, Chak No. 384 GB (Chaku), Tehsil Jaranwala, District Faisalabad, Province Punjab, Pakistan                                                      |
| 27 | CM.T     | 73.42829895 | 31.1753006  | Tube Well   | Acre No. 14, Square No. 01, Chah Mughlanwala, Tehsil Jaranwala, District Faisalabad, Province Punjab, Pakistan                                                             |
| 28 | 378 GB.T | 73.41770172 | 31.2343998  | Tube Well   | Acre No. 09, Square No. 20, Chak No. 378 GB (Hamand ka Chak), Sayedwala Road, Near Jaranwala Interchange, Tehsil Jaranwala, District Faisalabad, Province Punjab, Pakistan |
| 29 | 277 GB.T | 73.30899811 | 31.17210007 | Tube Well   | Acre No. 02, Square No. 14, Chak No. 277 GB (Nai Wala), Tehsil Jaranwala, District Faisalabad, Province Punjab, Pakistan                                                   |
| 30 | 112 GB.T | 73.37000275 | 31.3397007  | Tube Well   | Acre No. 10, Square No. 03, Chak No. 112 GB (Sikandarpur), Faisalabad Road, Tehsil Jaranwala, District Faisalabad, Province Punjab, Pakistan                               |
| 31 | 113 GB.T | 73.25090027 | 31.34989929 | Tube Well   | Acre No. 17, Square No. 08, Chak No. 113 GB, Faisalabad Road, Tehsil Jaranwala, District Faisalabad, Province Punjab, Pakistan                                             |
| 32 | 221 RB.C | 73.24790192 | 31.41860008 | Canal Water | Acre No. 23, Square No. 05, Chak No. 221 RB (Mulawaran Wala), Faisalabad Road, Tehsil Jaranwala, District Faisalabad, Province Punjab, Pakistan                            |
| 33 | 65 GB.T  | 73.3010025  | 31.34560013 | Tube Well   | Acre No. 01, Square No. 15, Chak No. 65 GB (Mukanpur), Faisalabad Road, Tehsil Jaranwala, District Faisalabad, Province Punjab, Pakistan                                   |
| 34 | 105 GB.C | 73.30699921 | 31.41200066 | Canal Water | Acre No. 22, Square No. 6, Chak No. 105 GB (Bangy), Faisalabad Road, Tehsil Jaranwala, District Faisalabad, Province Punjab, Pakistan                                      |
| 35 | 282 GB.T | 73.30819702 | 31.22640038 | Tube Well   | Acre No. 18, Square No. 09, Chak No. 282 GB (Shahamand), Tehsil Jaranwala, District Faisalabad, Province Punjab, Pakistan                                                  |
| 36 | 21 GB.C  | 73.37110138 | 31.29470062 | Canal Water | Acre No. 05, Square No. 07, Chak No. 21 GB, Satiana Road, Tehsil Jaranwala, District Faisalabad, Province Punjab, Pakistan                                                 |
| 37 | RP.T     | 73.61430359 | 31.29570007 | Tube Well   | Acre No. 03, Square No. 15, Rangpura, Lahore Road, Tehsil Jaranwala, District Faisalabad, Province Punjab, Pakistan                                                        |
| 38 | DS.T     | 73.54250336 | 31.2241993  | Tube Well   | Acre No. 16, Square No. 02, Dhup Sari, Tehsil Jaranwala, District Faisalabad, Province Punjab, Pakistan                                                                    |
| 39 | 365 GB.T | 73.31520081 | 31.10759926 | Tube Well   | Acre No. 13, Square No. 19, Chak No. 365 GB, Tehsil Jaranwala, District Faisalabad, Province Punjab, Pakistan                                                              |
| 40 | 63 RB.C  | 73.37039948 | 31.59320068 | Canal Water | Acre No. 10, Square No. 05, Chak No. 63 RB (Nihaloana Sahmal), Tehsil Jaranwala, District Faisalabad, Province Punjab, Pakistan                                            |

**Table S2.** Theoretical confusion matrix for Land Use and Land Cover (LU&LC) classification.

| S. No. | Classified   | Crop Land | Fallow Land | Barren Land | Water Bodies | Built-Up Area | Natural Vegetation | Total (User) | Correct Sampled |
|--------|--------------|-----------|-------------|-------------|--------------|---------------|--------------------|--------------|-----------------|
| 1      | Crop Land    | 10.00     | 1.00        | 0.00        | 0.00         | 0.00          | 0.00               | 11.00        | 10.00           |
| 2      | Fallow Land  | 4.00      | 10.00       | 1.00        | 0.00         | 0.00          | 1.00               | 16.00        | 10.00           |
| 3      | Barren Land  | 0.00      | 0.00        | 2.00        | 0.00         | 0.00          | 0.00               | 2.00         | 2.00            |
| 4      | Water Bodies | 0.00      | 0.00        | 0.00        | 1.00         | 0.00          | 0.00               | 1.00         | 1.00            |

|   |                         |              |              |             |             |             |             |              |              |
|---|-------------------------|--------------|--------------|-------------|-------------|-------------|-------------|--------------|--------------|
| 5 | Built-Up Area           | 0.00         | 0.00         | 3.00        | 0.00        | 2.00        | 0.00        | 5.00         | 2.00         |
| 6 | Natural Vegetation      | 1.00         | 0.00         | 1.00        | 0.00        | 0.00        | 3.00        | 5.00         | 5.00         |
|   | <b>Total (Producer)</b> | <b>15.00</b> | <b>11.00</b> | <b>7.00</b> | <b>1.00</b> | <b>2.00</b> | <b>4.00</b> | <b>40.00</b> | <b>30.00</b> |

**Table S3.** Statistical Parameters for Categorized Accuracy Evaluation.

| Classified Data              | Parameters     |                  |               |                   |                       |                       |
|------------------------------|----------------|------------------|---------------|-------------------|-----------------------|-----------------------|
|                              | Omission Error | Commission Error | User Accuracy | Producer Accuracy | Kappa Coefficient (K) | Overall Accuracy (OA) |
| Crop Land                    | 33.33          | 9.09             | 0.91          | 0.67              | 0.00                  | 0.00                  |
| Fallow Land                  | 90.91          | 37.50            | 0.63          | 0.91              | 0.00                  | 0.00                  |
| Barren Land                  | 100.00         | 0.00             | 1.00          | 0.29              | 0.00                  | 0.00                  |
| Water Bodies                 | 100.00         | 100.00           | 1.00          | 1.00              | 0.00                  | 0.00                  |
| Built-Up Area                | 100.00         | 60.00            | 0.40          | 1.00              | 0.00                  | 0.00                  |
| Natural Vegetation           | 100.00         | 40.00            | 0.60          | 0.75              | 0.00                  | 0.00                  |
| <b>Kappa Coefficient (K)</b> | 0.00           | 0.00             | 0.00          | 0.00              | <b>0.61</b>           | 0.00                  |
| <b>Overall Accuracy (OA)</b> | 0.00           | 0.00             | 0.00          | 0.00              | 0.00                  | <b>0.70</b>           |

**Table S4.** Rating criteria of Cohen's Kappa statistics.

| S. No. | Cohen's Kappa Statistics | Degree of Consensus      | Explanation                                                                                 |
|--------|--------------------------|--------------------------|---------------------------------------------------------------------------------------------|
| 1      | $K < 0.0$                | Poor agreement           | The agreement indicates a serious performance issue in the classification model.            |
| 2      | $0.01 \leq K < 0.20$     | Slight agreement         | The level of agreement may not be practical for real-world use.                             |
| 3      | $0.21 \leq K < 0.40$     | Fair agreement           | It indicates moderate alignment between the model's predictions and the true labels.        |
| 4      | $0.41 \leq K < 0.60$     | Moderate agreement       | The model's predictions and the true labels exhibit a reasonably good level of concordance. |
| 5      | $0.61 \leq K < 0.80$     | Substantial agreement    | The model's performance is quite robust and practical for real-world use.                   |
| 6      | $K \geq 0.81$            | Almost perfect agreement | This strongly indicates the model's accuracy and reliability.                               |

**Table S5.** Saaty's Analytical Hierarchy Process (AHP) for Irrigation Water.

| Matrix          | pH | EC  | SAR | RSC | TDS | Cl <sup>-</sup> | Normalized Principal Eigenvector | +/-    |
|-----------------|----|-----|-----|-----|-----|-----------------|----------------------------------|--------|
|                 | #  | 1   | 2   | 3   | 4   | 5               | 6                                |        |
| pH              | 1  | 1   | 2   | 3   | 3   | 4               | 4                                | 34.55% |
| EC              | 2  | 1/2 | 1   | 2   | 3   | 3               | 4                                | 24.35% |
| SAR             | 3  | 1/3 | 1/2 | 1   | 2   | 2               | 3                                | 15.06% |
| RSC             | 4  | 1/3 | 1/3 | 1/2 | 1   | 3               | 4                                | 13.18% |
| TDS             | 5  | 1/4 | 1/3 | 1/2 | 1/3 | 1               | 3                                | 8.05%  |
| Cl <sup>-</sup> | 6  | 1/4 | 1/4 | 1/3 | 1/4 | 1/3             | 1                                | 4.81%  |

Eigenvalue ( $\lambda$ ) = 6.35; Mean Relative error (MRE) of the weights = 37.4%; Geometric consistency index (GCI) = 0.21; and Consistency ratio (CR) = 5.6%.

**Table S6.** Saaty's Analytical Hierarchy Process (AHP) for Soybean Crop Requirements.

| Matrix                | pH <sub>s</sub> | EC <sub>e</sub> | SAR | OM (%) | Avail. P | Avail. K <sup>+</sup> | SSP (%) | Texture | Slope (%) | LU&LC | Normalized Principal Eigenvector | +/-    |
|-----------------------|-----------------|-----------------|-----|--------|----------|-----------------------|---------|---------|-----------|-------|----------------------------------|--------|
|                       | #               | 1               | 2   | 3      | 4        | 5                     | 6       | 7       | 8         | 9     | 10                               |        |
| pH <sub>s</sub>       | 1               | 1               | 2   | 1/2    | 1/3      | 3                     | 2       | 3       | 1         | 1/4   | 1/7                              | 6.65%  |
| EC <sub>e</sub>       | 2               | 1/2             | 1   | 2      | 1/3      | 3                     | 2       | 2       | 1/3       | 1/5   | 1/5                              | 5.80%  |
| SAR                   | 3               | 2               | 1/2 | 1      | 1/3      | 2                     | 2       | 2       | 1/2       | 1/3   | 1/7                              | 5.81%  |
| OM (%)                | 4               | 3               | 3   | 3      | 1        | 2                     | 2       | 5       | 3         | 1/2   | 1/3                              | 13.34% |
| Avail. P              | 5               | 1/3             | 1/3 | 1/2    | 1/2      | 1                     | 1       | 2       | 1/3       | 1/3   | 1/7                              | 3.80%  |
| Avail. K <sup>+</sup> | 6               | 1/2             | 1/2 | 1/2    | 1/2      | 1                     | 1       | 2       | 1/3       | 1/3   | 1/5                              | 4.14%  |
| SSP (%)               | 7               | 1/3             | 1/2 | 1/2    | 1/5      | 1/2                   | 1/2     | 1       | 1         | 1/3   | 1/7                              | 3.42%  |
| Texture               | 8               | 1               | 3   | 2      | 1/3      | 3                     | 3       | 1       | 1         | 1     | 1/5                              | 9.20%  |
| Slope (%)             | 9               | 4               | 5   | 3      | 2        | 3                     | 3       | 3       | 1         | 1     | 2                                | 19.75% |
| LU&LC                 | 10              | 7               | 5   | 7      | 3        | 7                     | 5       | 7       | 5         | 1/2   | 1                                | 28.09% |

Eigenvalue ( $\lambda$ ) = 11.08; Mean Relative error (MRE) of the weights = 48.6%; Geometric consistency index (GCI) = 0.29; and Consistency ratio (CR) = 8.1%.

**Table S7.** Saaty's Analytical Hierarchy Process (AHP) for Soybean crop land suitability.

| Matrix                   |   | Land Suitability | Irrigation Water Quality | Climatic Conditions | Normalized Principal Eigenvector |
|--------------------------|---|------------------|--------------------------|---------------------|----------------------------------|
|                          | # | 1                | 2                        | 3                   |                                  |
| Land Suitability         | 1 | 1                | 3                        | 1/2                 | 33.25%                           |
| Irrigation Water Quality | 2 | 1/3              | 1                        | 1/3                 | 13.96%                           |
| Climatic Conditions      | 3 | 2                | 3                        | 1                   | 52.78%                           |

Eigenvalue ( $\lambda$ ) = 3.05; Mean Relative error (MRE) of the weights = 23.0%; Geometric consistency index (GCI) = 0.16; and Consistency ratio (CR) = 5.6%.

**Table S8.** Overview of Datasets and Thematic Maps, Including Sources, Resolutions, and Relevant Information.

| Dataset                             | Attributes                                                                                                                                                                                                                                                                                                                                                                | Resolution                  | Source                                 | Description and Use                                                                                                                                                         |
|-------------------------------------|---------------------------------------------------------------------------------------------------------------------------------------------------------------------------------------------------------------------------------------------------------------------------------------------------------------------------------------------------------------------------|-----------------------------|----------------------------------------|-----------------------------------------------------------------------------------------------------------------------------------------------------------------------------|
| Sentinel-2A Images                  | Band 2 - Blue (496.6 nm)<br>Band 3 - Green (560 nm)<br>Band 4 - Red (664.5 nm)<br>Band 8 - NIR (835.1 nm)                                                                                                                                                                                                                                                                 | 10 m                        | USGS (United States Geological Survey) | Multispectral satellite imagery for land use & cover type (crop land, fallow land, barren land, water bodies, built-up area, and vegetation) classification and monitoring. |
| Digital Elevation Model (DEM)       | Elevation (m)<br>Slope (%)                                                                                                                                                                                                                                                                                                                                                | 1 arc-second (Approx. 30 m) | USGS (United States Geological Survey) | Elevation data for topographic analysis, slope, and aspect calculations.                                                                                                    |
| NASA Power Data Access Viewer (DAV) | Precipitation (mm)<br>Temperature (°C)                                                                                                                                                                                                                                                                                                                                    | 2 m                         | NASA's POWER project                   | Historical and real-time precipitation and temperature data for climate change studies.                                                                                     |
| Soil Map                            | Soil EC <sub>e</sub> (dSm <sup>-1</sup> )<br>Soil pH <sub>s</sub><br>SAR (mmol <sub>c</sub> L <sup>-1</sup> ) <sup>1/2</sup><br>Organic Matter (%)<br>Available P (mg kg <sup>-1</sup> )<br>Extractable K <sup>+</sup> (mg kg <sup>-1</sup> )<br>Soil Saturation (%)<br>Soil Texture<br>a. Sand (%)<br>b. Silt (%)<br>c. Clay (%)<br>Water pH<br>EC (dS m <sup>-1</sup> ) | Variable                    | Ground Truth Data                      | Information about soil physical and chemical properties for agriculture and land use planning.                                                                              |
| Irrigation Water Map                | SAR (mmol L <sup>-1</sup> ) <sup>1/2</sup><br>RSC (me L <sup>-1</sup> )<br>Chloride (me L <sup>-1</sup> )<br>TDS (ppm)                                                                                                                                                                                                                                                    | Variable                    | Ground Truth Data                      | Information about irrigation water quality for agriculture use.                                                                                                             |

**Table S9.** Land suitability classification structure.

| Suitability Class        | Symbol | Description                                                                                                                                                                             |
|--------------------------|--------|-----------------------------------------------------------------------------------------------------------------------------------------------------------------------------------------|
| Highly suitable          | S1     | It is possible for the land to sustain its use over the long term, with benefits that outweigh the resources invested.                                                                  |
| Moderately suitable      | S2     | Although the land may appear appropriate for use, certain constraints may limit its productivity or require greater resources to maintain productivity when compared to S1 land.        |
| Marginally suitable      | S3     | Land that has significant constraints, resulting in reduced benefits and increased input requirements for production, which may only be marginally justifiable in terms of their costs. |
| Currently not suitable   | N1     | Land that is unable to sustain the intended land use over the long term, or land where the benefits do not outweigh the required inputs.                                                |
| Permanently not suitable | N2     | Land that has inherent constraints to long-term sustainable use that cannot be mitigated or overcome.                                                                                   |



**Table S10.** Basic requirements for the cultivation of soybean crop.

| Parameters                        | Value                 | Reference |
|-----------------------------------|-----------------------|-----------|
| Temperature (°C)                  | 10°C (minimum)        | [82, 83]  |
|                                   | 24°C (optimum)        |           |
|                                   | 36 °C (maximum)       |           |
| Precipitation (mm)                | 400 - 500 mm          | [84]      |
| Salinity/EC (dS m <sup>-1</sup> ) | 5 dS m <sup>-1</sup>  | [85]      |
|                                   | (50% Yield Reduction) |           |
| pH                                | 6.5 - 7.5             | [86]      |
| Slope (%)                         | < 5%                  | [87]      |
| Texture                           | Loam                  | [87]      |

**Table S11.** Ten-year climatological met data for temperature (°C) of the study area.

| Sr. # | Latitude-Y | Longitude-X | T2M (MAX) | T2M (MIN) | T2M   |
|-------|------------|-------------|-----------|-----------|-------|
| 01    | 31.3454    | 73.4298     | 51.14     | -1.68     | 26.29 |
| 02    | 31.3441    | 73.4146     | 49.44     | 1.08      | 25.80 |
| 03    | 31.3822    | 73.3603     | 49.44     | 1.08      | 25.80 |
| 04    | 31.3963    | 73.4956     | 49.26     | 0.84      | 25.40 |
| 05    | 31.3089    | 73.4812     | 49.26     | 0.84      | 25.40 |
| 06    | 31.3153    | 73.3541     | 49.44     | 1.08      | 25.80 |
| 07    | 31.4344    | 73.5031     | 49.26     | 0.84      | 25.40 |
| 08    | 31.4414    | 73.3555     | 49.44     | 1.08      | 25.80 |
| 09    | 31.2267    | 73.5073     | 49.19     | 1.18      | 25.92 |
| 10    | 31.2361    | 73.3493     | 49.38     | 1.83      | 26.31 |
| 11    | 31.1974    | 73.431      | 49.38     | 1.83      | 26.31 |
| 12    | 31.3453    | 73.5636     | 49.26     | 0.84      | 25.40 |
| 13    | 31.3552    | 73.2896     | 49.44     | 1.08      | 25.80 |
| 14    | 31.48      | 73.4324     | 49.44     | 1.08      | 25.80 |
| 15    | 31.2126    | 73.2443     | 49.38     | 1.83      | 26.31 |
| 16    | 31.1439    | 73.3418     | 49.38     | 1.83      | 26.31 |

T2M = Temperature (°C) at 2 Meters ; T2M (MAX) = Maximum Temperature (°C) at 2 Meters ; T2M (MIN) = Minimum Temperature (°C) at 2 Meters.

**Table S12.** Ten-year climatological met data for precipitation (mm) of the study area.

| Sr. # | Latitude Y | Longitude X | PRECTOTCOR | PRECTOTCORR_SUM | RH2M  | FROST DAYS |
|-------|------------|-------------|------------|-----------------|-------|------------|
| 01    | 31.3454    | 73.4298     | 1.17       | 381.27          | 37.17 | 0.30       |
| 02    | 31.3441    | 73.4146     | 1.47       | 504.51          | 42.22 | 0.00       |
| 03    | 31.3822    | 73.3603     | 1.47       | 504.51          | 42.22 | 0.00       |
| 04    | 31.3963    | 73.4956     | 1.74       | 597.75          | 44.80 | 0.00       |
| 05    | 31.3089    | 73.4812     | 1.74       | 597.75          | 44.80 | 0.00       |
| 06    | 31.3153    | 73.3541     | 1.47       | 504.51          | 42.22 | 0.00       |
| 07    | 31.4344    | 73.5031     | 1.74       | 597.75          | 44.80 | 0.00       |
| 08    | 31.4414    | 73.3555     | 1.47       | 504.51          | 42.22 | 0.00       |
| 09    | 31.2267    | 73.5073     | 1.43       | 477.59          | 42.09 | 0.00       |
| 10    | 31.2361    | 73.3493     | 1.26       | 431.92          | 39.65 | 0.00       |
| 11    | 31.1974    | 73.431      | 1.26       | 431.92          | 39.65 | 0.00       |
| 12    | 31.3453    | 73.5636     | 1.74       | 597.75          | 44.80 | 0.00       |
| 13    | 31.3552    | 73.2896     | 1.47       | 504.51          | 42.22 | 0.00       |
| 14    | 31.48      | 73.4324     | 1.47       | 504.51          | 42.22 | 0.00       |
| 15    | 31.2126    | 73.2443     | 1.26       | 431.92          | 39.65 | 0.00       |
| 16    | 31.1439    | 73.3418     | 1.26       | 431.92          | 39.65 | 0.00       |

PRECTOTCORR = Precipitation Corrected (mm/day); PRECTOTCORR\_SUM = Precipitation Corrected Sum (mm); RH2M = Relative Humidity at 2 Meters (%).
